# Supplementary material for: Spectacular luminescent behaviour of tandem terpyridyl platinum(ii) acetylide complexes attributed to solvent effect on ordering of excited states, “ion-pair” formation and molecular conformations
Source: Royal Society of Chemistry journal article supplement (doi:10.1039/c0sc00427h), 2010-10-14
Supplement: c0sc00427h.pdf [file c0sc00427h.pdf]

## **Supporting Information**

### **Spectacular Luminescent Behaviour of Tandem Terpyridyl Platinum(II) Acetylide Complexes Attributed to Solvent Effect on Ordering of Excited States, “Ion-Pair” Formation and Molecular Conformations.**

*By*

*Steven C. F. Kui, Yuen-Chi Law, Glenna So Ming Tong, Wei Lu, Mai-Yan Yuen and Chi-Ming Che\**

Department of Chemistry, The University of Hong Kong, Pokfulam Road, Hong Kong  
SAR, China

cmche@hku.hk

*(1) Detail Experimental*

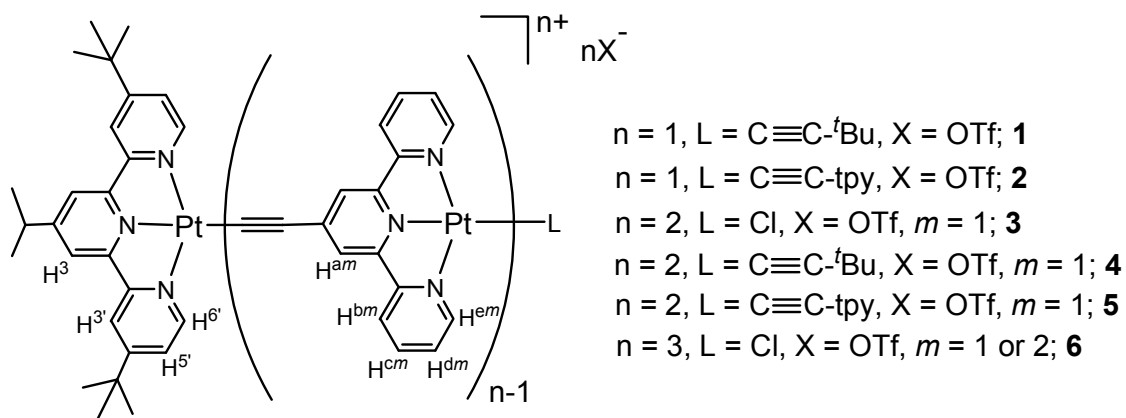

### Syntheses.

**[(<sup>t</sup>Bu<sub>3</sub>tpy)PtC≡C<sup>t</sup>Bu](OTf) (1).** Ligand HC≡C<sup>t</sup>Bu (18.9 mg, 0.23 mmol) was added to a solution of [(<sup>t</sup>Bu<sub>3</sub>tpy)PtCl](OTf) (180 mg, 0.23 mmol), CuI (10 mg, 0.05 mmol), and diisopropylamine (1 mL) in dichloromethane (20 mL). The mixture, after stirring for 12 h at room temperature under an argon atmosphere, was evaporated to dryness *in vacuo*. The product was purified by chromatography on an alumina (neutral) column with (CH<sub>2</sub>Cl<sub>2</sub>/MeCN) (4/1, *v/v*) as eluent to afford a yellow solid. Yield: 158 mg, 83 %. Anal. Calcd for C<sub>34</sub>H<sub>44</sub>F<sub>3</sub>N<sub>3</sub>O<sub>3</sub>PtS: C, 49.39; H, 5.36; N, 5.08. Found: C, 49.45; H, 5.35; N, 5.10. <sup>1</sup>H NMR (500 MHz, CD<sub>3</sub>CN): δ 1.37 (s, 9H, <sup>t</sup>Bu), 1.46 (s, 18H, <sup>t</sup>Bu), 1.53 (s, 9H, <sup>t</sup>Bu), 7.74 (dd, 2H, <sup>3</sup>J<sub>HH</sub> = 6.0 Hz, <sup>4</sup>J<sub>HH</sub> = 2.1 Hz, H<sup>5'</sup>), 8.26 (d, 2H, <sup>4</sup>J<sub>HH</sub> = 1.9 Hz, H<sup>3'</sup>), 8.29 (s, 2H, H<sub>3</sub>), 8.97 (d with broad <sup>195</sup>Pt satellites, 2H, <sup>3</sup>J<sub>HH</sub> = 6.0 Hz, H<sup>6'</sup>). <sup>195</sup>Pt NMR (107 MHz, CD<sub>3</sub>CN): δ -3129 (s). FAB-MS (+ve NBA matrix): *m/z* 677 [M - OTf]<sup>+</sup>. IR (Nujol):  $\tilde{\nu}$  (C≡C) 2119 cm<sup>-1</sup>.

**[(<sup>t</sup>Bu<sub>3</sub>tpy)PtC≡Ctpy](OTf) (2).** Ligand HC≡Ctpy (34 mg, 0.13 mmol) was added to a solution of [(<sup>t</sup>Bu<sub>3</sub>tpy)PtCl](OTf) (94 mg, 0.12 mmol), CuI (10 mg, 0.05 mmol), and diisopropylamine (1 mL) in dichloromethane (20 mL). The mixture, after stirring for 5 days at room temperature under an argon atmosphere, was evaporated to dryness *in vacuo*. The product was purified by chromatography on an alumina (neutral) column with (CH<sub>2</sub>Cl<sub>2</sub>/MeCN) (5/1, *v/v*) as eluent to afford a bright yellow solid. Yield: 73 mg, 61 %. Anal. Calcd for C<sub>45</sub>H<sub>45</sub>N<sub>6</sub>O<sub>3</sub>SF<sub>3</sub>Pt·2H<sub>2</sub>O: C, 52.07; H, 4.76; N, 8.10. Found: C, 52.06; H, 4.46; N, 7.98. <sup>1</sup>H NMR (500 MHz, CD<sub>3</sub>CN): δ 1.38 (s, 18H, <sup>t</sup>Bu), 1.46 (s, 9H, <sup>t</sup>Bu), 7.33 (qd, 2H, *J*<sub>HH</sub> = 1.1, 7.4 Hz, H<sup>d1</sup>), 7.65 (dd, 2H, *J*<sub>HH</sub> = 2.1, 5.9 Hz, H<sup>5'</sup>), 7.83 (td, 2H, *J*<sub>HH</sub> =

1.7, 7.7 Hz, H<sup>c1</sup>), 7.90 (d, 2H,  $J_{\text{HH}} = 1.9$  Hz, H<sup>3'</sup>), 7.97 (s, 2H, H<sup>3</sup>), 8.22 (s, 2H, H<sup>a1</sup>), 8.27 (d, 2H,  $J_{\text{HH}} = 7.9$  Hz, H<sup>b1</sup>), 8.45 (d, 2H,  $J_{\text{HH}} = 4.6$  Hz, H<sup>e1</sup>), 8.97 (d with broad <sup>195</sup>Pt satellites, 2H,  $J_{\text{HH}} = 5.9$  Hz, H<sup>6'</sup>). <sup>195</sup>Pt{<sup>1</sup>H} NMR (107 MHz, CD<sub>3</sub>CN):  $\delta$ -3108 (s). FAB-MS (+ve NBA matrix):  $m/z$  853 [**2** - (OTf)]<sup>+</sup>; ESI-MS (MeCN):  $m/z$  853 [**2** - (OTf)]<sup>+</sup>. IR (Nujol):  $\tilde{\nu}$  (C≡C) 2091; 2124 cm<sup>-1</sup>.

**[(<sup>t</sup>Bu<sub>3</sub>tpy)Pt(C≡Ctpy)PtCl](OTf)<sub>2</sub> (3).** [(COD)PtCl<sub>2</sub>] (5 mg, 0.04 mmol) and **2** (36 mg, 0.036 mmol) were dissolved in a mixture of H<sub>2</sub>O/acetone (1/4, v/v, 25 mL). The solution was heated at 100 °C for 12 h to give a bright orange solution. Upon removal of solvent, the orange solid was dissolved in warm CH<sub>3</sub>CN (10 mL) and the solution was filtered into an aqueous solution of NaOTf (34 mg, 2 mL). A reddish orange precipitate was collected on a sintered-glass funnel and air-dried. Yield: 35 mg, 70 %. Anal. Calcd for C<sub>46</sub>H<sub>45</sub>N<sub>6</sub>ClO<sub>6</sub>S<sub>2</sub>F<sub>6</sub>Pt<sub>2</sub>·2H<sub>2</sub>O: C, 38.97; H, 3.48; N, 5.93. Found: C, 38.90; H, 3.44; N, 5.93. <sup>1</sup>H NMR (500 MHz, DMF-*d*<sub>7</sub>):  $\delta$  1.49 (s, 18H, <sup>t</sup>Bu), 1.56 (s, 9H, <sup>t</sup>Bu), 7.38 (br, 2H, H<sup>5'</sup>), 7.54 (br, 2H, H<sup>d1</sup>), 8.28 (br, s, 2H, H<sup>e1</sup>), 8.41 (t, 2H,  $J_{\text{HH}} = 7.4$  Hz, H<sup>c1</sup>), 8.48 (br, s, 2H, H<sup>6'</sup>), 8.61 (s, 2H, H<sup>3</sup>), 8.70 (d, 2H,  $J_{\text{HH}} = 6.4$  Hz, H<sup>b1</sup>), 8.80 (s, 2H, H<sup>3'</sup>), 8.87 (s, 2H, H<sup>a1</sup>). FAB-MS (+ve NBA matrix):  $m/z$  1233 [**3** - (OTf)]<sup>+</sup>, 1083 [**3** - 2(OTf)]<sup>+</sup>; ESI-MS (MeCN):  $m/z$  1233 [**3** - (OTf)]<sup>+</sup>, 542 [**3** - 2(OTf)]<sup>2+</sup>. IR (Nujol):  $\tilde{\nu}$  (C≡C) 2097; 2122 cm<sup>-1</sup>.

**[(<sup>t</sup>Bu<sub>3</sub>tpy)Pt(C≡Ctpy)PtC≡C<sup>t</sup>Bu](OTf)<sub>2</sub> (4).** Ligand HC≡C<sup>t</sup>Bu (2.3 mg, 0.028 mmol) was added to a solution of **3** (35 mg, 0.025 mmol), CuI (1 mg, 0.005 mmol), and diisopropylamine (0.5 mL) in CH<sub>2</sub>Cl<sub>2</sub>/CH<sub>3</sub>CN (1/1, v/v, 20 mL). The resultant solution, after stirring for 12 h at room temperature under an argon atmosphere, was evaporated to dryness *in vacuo*. The crude product was purified by chromatography on an alumina (neutral) column with (CH<sub>2</sub>Cl<sub>2</sub>/MeCN) (1/1, v/v) as eluent. Orange needles were obtained by vapor diffusion of diethyl ether into an acetonitrile solution. Yield: 20 mg, 56 %. Anal. Calcd for C<sub>52</sub>H<sub>54</sub>N<sub>6</sub>O<sub>6</sub>S<sub>2</sub>F<sub>6</sub>Pt<sub>2</sub>·2H<sub>2</sub>O: C, 42.68; H, 4.00; N, 5.74. Found: C, 42.61; H, 3.81; N, 6.10. <sup>1</sup>H NMR (500 MHz, CD<sub>3</sub>CN):  $\delta$  1.10 (s, 9H, C≡C<sup>t</sup>Bu), 1.47 (s, 18H, <sup>t</sup>Bu), 1.58 (s, 9H, <sup>t</sup>Bu), 7.23 (br, s, 2H, H<sup>d1</sup>), 7.39 (d, 2H,  $J_{\text{HH}} = 4.2$  Hz, H<sup>5'</sup>), 7.93 (t, 2H,  $J_{\text{HH}} = 7.6$  Hz, H<sup>c1</sup>), 8.13 (s, 2H, H<sup>3</sup>), 8.21 (br, s, 4H, H<sup>3'</sup> and H<sup>b1</sup>), 8.30 (s, 2H,  $J_{\text{HH}} = 5.5$  Hz, H<sup>e1</sup>), 8.32 (s, 2H, H<sup>a1</sup>), 8.49 (d, 2H,  $J_{\text{HH}} = 7.1$  Hz, H<sup>6'</sup>). FAB-MS (+ve NBA matrix):  $m/z$

1278 [4 - (OTf)]<sup>+</sup>, 1129 [4 - 2(OTf)]<sup>+</sup>; ESI-MS (MeCN): *m/z* 1278 [4 - (OTf)]<sup>+</sup>, 564 [4 - 2(OTf)]<sup>2+</sup>. IR (Nujol):  $\tilde{\nu}$  (C≡C) 2093; 2124 cm<sup>-1</sup>.

[(<sup>t</sup>Bu<sub>3</sub>tpy)Pt(C≡Ctpy)PtC≡Ctpy](OTf)<sub>2</sub> (**5**). Ligand HC≡Ctpy (11 mg, 0.039 mmol) was added to a solution of **3** (35 mg, 0.025 mmol), CuI (1 mg, 0.005 mmol), and diisopropylamine (0.5 mL) in CH<sub>2</sub>Cl<sub>2</sub>/CH<sub>3</sub>CN (1/1, *v/v*, 20 mL). After stirring for 12 h at room temperature under an argon atmosphere, the solution was evaporated to dryness *in vacuo*, and the solid was dissolved in a minimum amount of acetonitrile. The solution was filtered through celite and the filtrate was stored at 4 °C for 3 days. The light brown precipitate was washed with CH<sub>2</sub>Cl<sub>2</sub> (5 mL) to afford a brownish orange solid. Yield: 30 mg, 52 %. Anal. Calcd for C<sub>63</sub>H<sub>55</sub>N<sub>9</sub>O<sub>6</sub>S<sub>2</sub>F<sub>6</sub>Pt<sub>2</sub>·2H<sub>2</sub>O: C, 46.18; H, 3.63; N, 7.81. Found: C, 45.78; H, 3.53; N, 7.86. <sup>1</sup>H NMR (500 MHz, 353 K, DMF-*d*<sub>7</sub>):  $\delta$  1.16 (s, 9H, <sup>t</sup>Bu), 1.51 (s, 18H, <sup>t</sup>Bu), 7.46 (br, s, 2H, H<sup>d2</sup>), 7.69–7.72 (m, 4H, H<sup>5'</sup> and H<sup>d1</sup>), 7.99 (s, 2H, H<sup>c2</sup>), 8.30 (br, s, 2H, H<sup>a2</sup>), 8.36 (t, 2H, *J*<sub>HH</sub> = 7.4 Hz, H<sup>c1</sup>), 8.59–8.61 (m, 6H, H<sup>3</sup>, H<sup>a1</sup> and H<sup>b2</sup>), 8.72 (br, s, 6H, H<sup>3'</sup>, H<sup>b1</sup> and H<sup>e2</sup>), 8.78–8.85 (m, 4H, H<sup>6'</sup> and H<sup>e1</sup>). FAB-MS (+ve NBA matrix): *m/z* 1454 [5 - (OTf)]<sup>+</sup>, 1304 [5 - 2(OTf)]<sup>+</sup>; ESI-MS (MeCN): *m/z* 1454 [5 - (OTf)]<sup>+</sup>, 652 [5 - 2(OTf)]<sup>2+</sup>. IR (Nujol):  $\tilde{\nu}$  (C≡C) 2095; 2124 cm<sup>-1</sup>.

[(<sup>t</sup>Bu<sub>3</sub>tpy)Pt(C≡Ctpy)Pt(C≡Ctpy)PtCl](OTf)<sub>3</sub> (**6**): [(COD)PtCl<sub>2</sub>] (15 mg, 0.04 mmol) and **6** (50 mg, 0.030 mmol) were dissolved in H<sub>2</sub>O/acetone (1/4, *v/v*, 25 mL). The solution was heated at 100 °C for 24 h to give a red solution, which was filtered into an aqueous solution of NaOTf (50 mg, 2 mL). The brownish orange precipitate was collected and air-dried. Yield: 32 mg, 52 %. Anal. Calcd for C<sub>64</sub>H<sub>55</sub>N<sub>9</sub>ClO<sub>9</sub>S<sub>3</sub>F<sub>9</sub>Pt<sub>3</sub>: C, 38.78; H, 2.80; N, 6.36. Found: C, 38.74; H, 3.20; N, 6.00. <sup>1</sup>H NMR (500 MHz, 353 K, DMF-*d*<sub>7</sub>):  $\delta$  1.67 (s, 18H, <sup>t</sup>Bu), 1.71 (s, 9H, <sup>t</sup>Bu), 7.97–7.99 (br, 2H, H<sup>5'</sup>), 8.09–8.11 (br, fused with DMF-*d*<sub>7</sub> peak, 2H, H<sup>d2</sup>), 8.18–8.21 (br, fused with DMF-*d*<sub>7</sub> peak, 2H, H<sup>d1</sup>), 8.66 (t, *J* = 8.0 Hz, 2H, H<sup>c2</sup>), 8.86–8.88 (m, 4H, H<sup>3</sup> and H<sup>b2</sup>), 8.90–8.95 (m, 8 H, H<sup>3'</sup>, H<sup>a1</sup>, H<sup>b1</sup> and H<sup>c1</sup>), 9.01 (s, 2H, H<sup>a2</sup>), 9.06 (m, 2H, H<sup>e2</sup>), 9.14 (d, *J* = 6.1 Hz, 2H, H<sup>e1</sup>), 9.24 (m, 2H, H<sup>b1</sup>). FAB-MS (+ve NBA matrix): *m/z* 1834 [6 - (OTf)]<sup>+</sup>, 1685 [6 - 2(OTf)]<sup>+</sup>, 1534 [6 - 3(OTf)]<sup>+</sup>; ESI-MS (MeCN): *m/z* 1833 [6 - (OTf)]<sup>+</sup>. IR (Nujol):  $\tilde{\nu}$  (C≡C) 2097; 2124 cm<sup>-1</sup>.

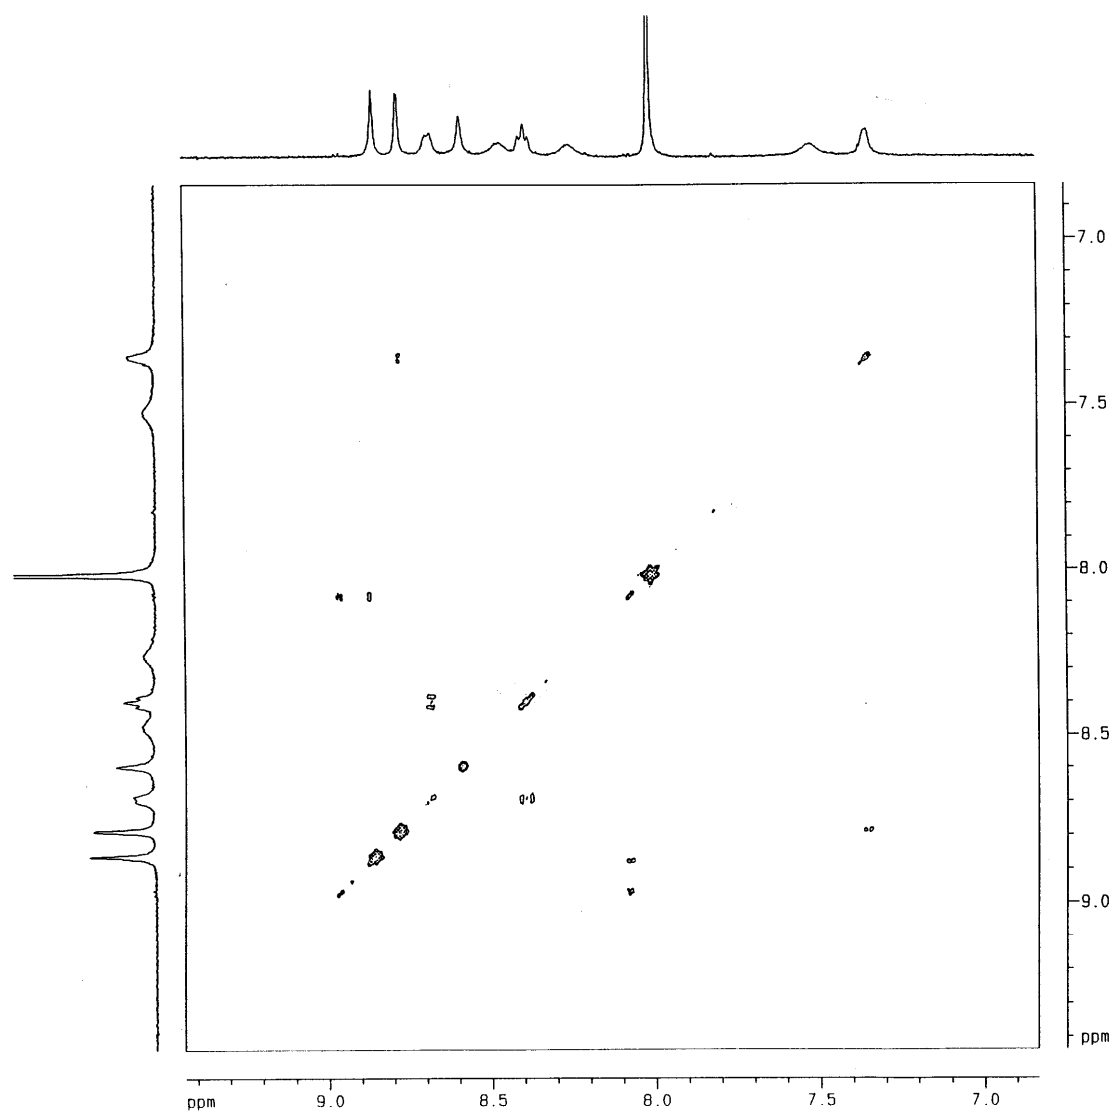

**Figure S1.** <sup>1</sup>H-<sup>1</sup>H COSY spectrum of [(<sup>t</sup>Bu<sub>3</sub>tpy)Pt(C≡Ctpy)PtCl](OTf)<sub>2</sub> (**3**) in DMF-*d*<sub>7</sub> at 299 K.

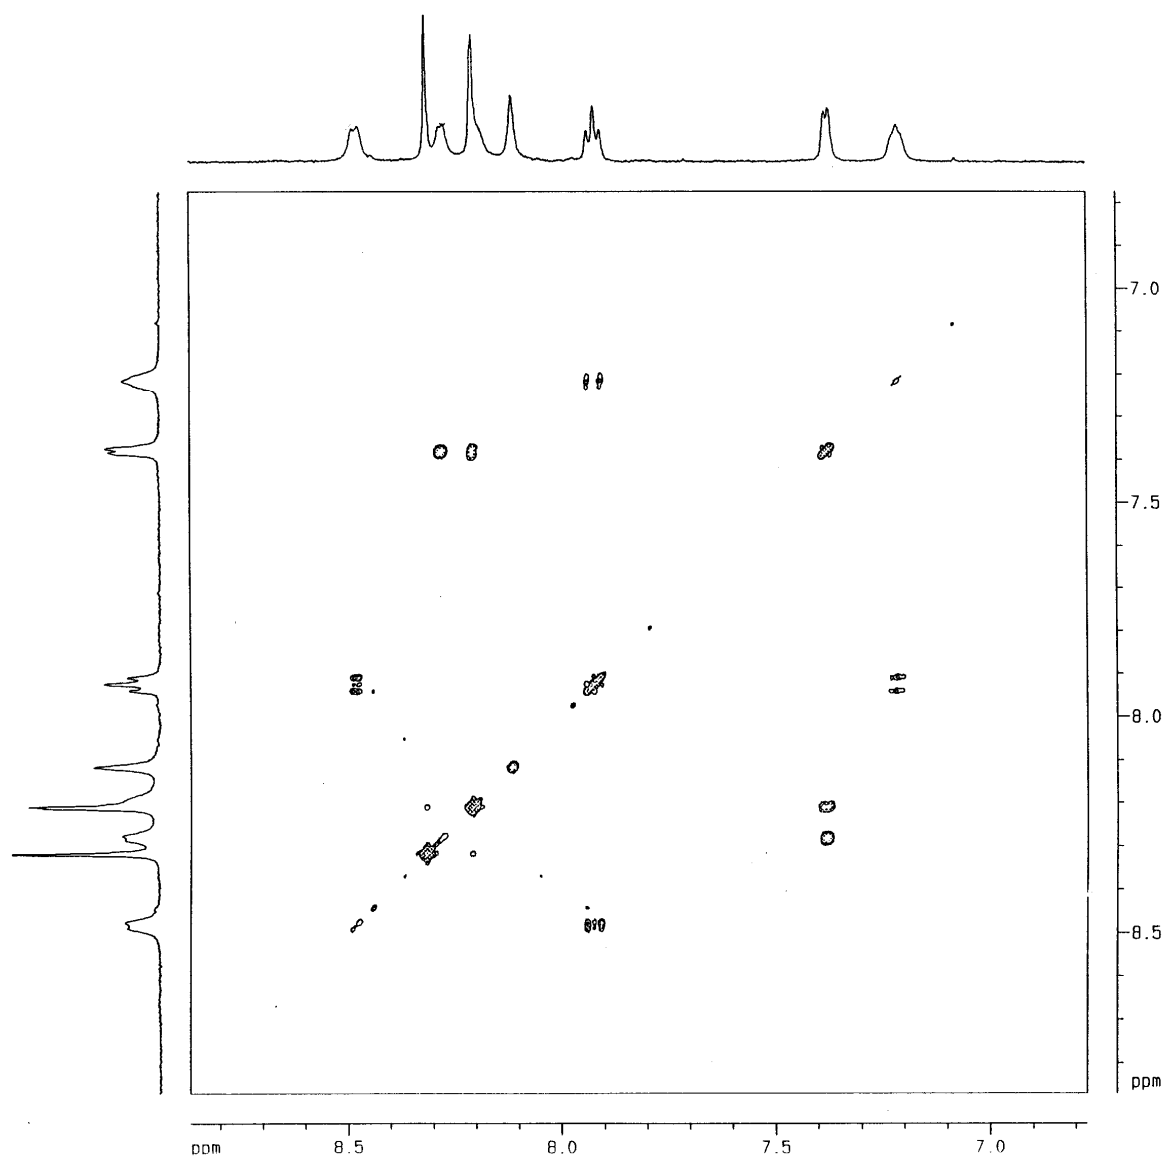

**Figure S2.**  $^1\text{H}$ - $^1\text{H}$  COSY spectrum of  $[(^t\text{Bu}_3\text{tpy})\text{Pt}(\text{C}\equiv\text{Ctpy})\text{PtC}\equiv\text{C}^t\text{Bu}](\text{OTf})_2$  (**4**) in  $\text{CD}_3\text{CN}$  at 298 K.

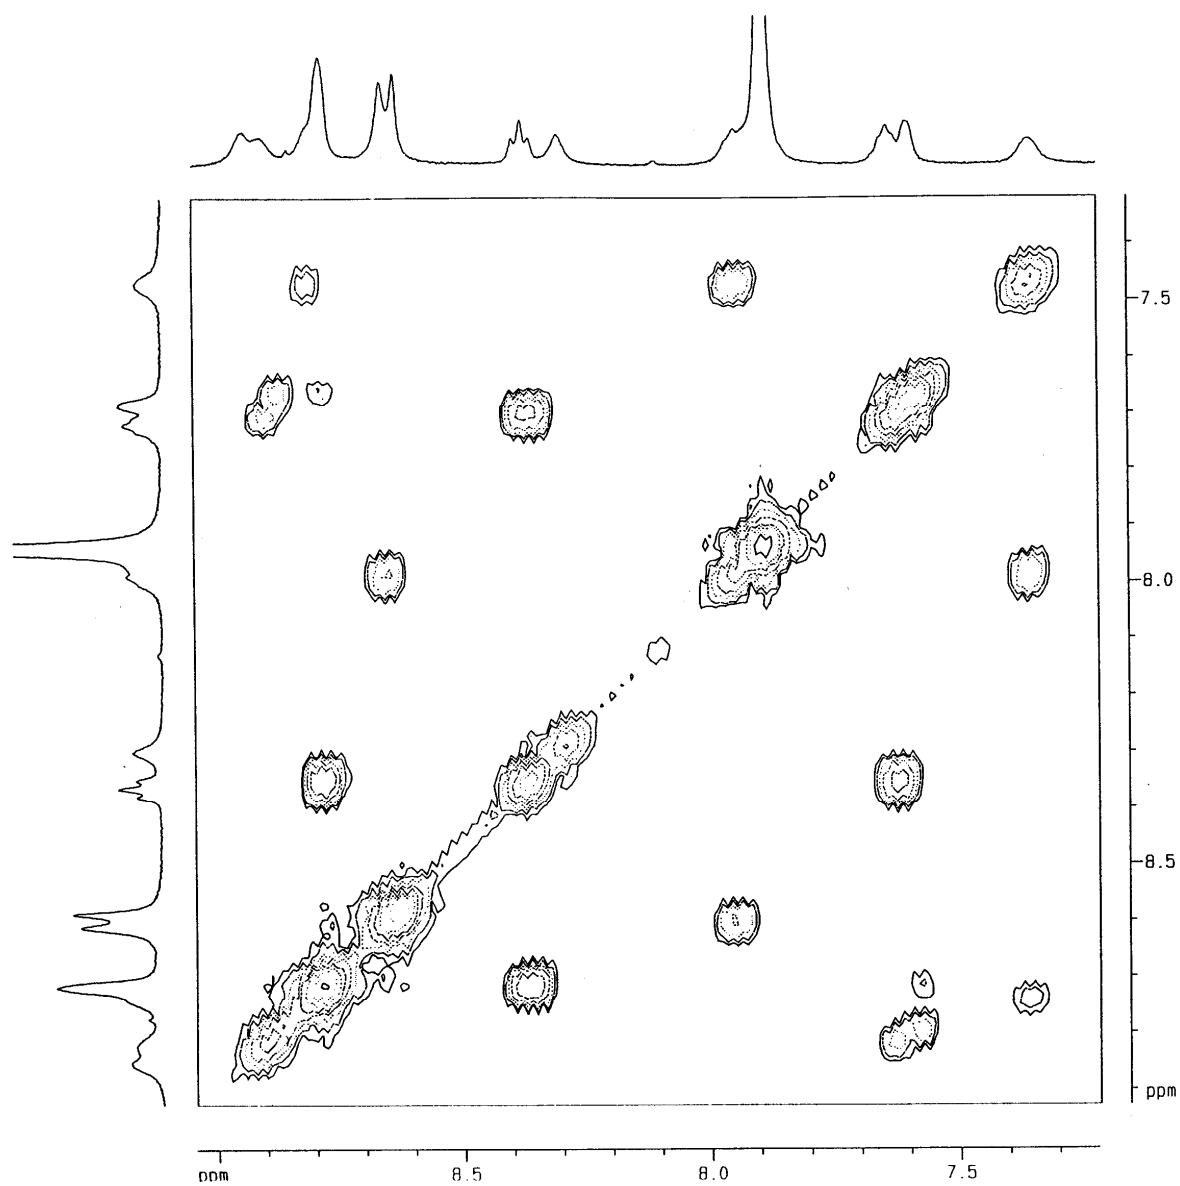

**Figure S3.**  $^1\text{H}$ - $^1\text{H}$  COSY spectrum of  $[(^i\text{Bu}_3\text{tpy})\text{Pt}(\text{C}\equiv\text{Ctpy})\text{PtC}\equiv\text{Ctpy}](\text{OTf})_2$  (**5**) in  $\text{DMF-}d_7$  at 353 K.

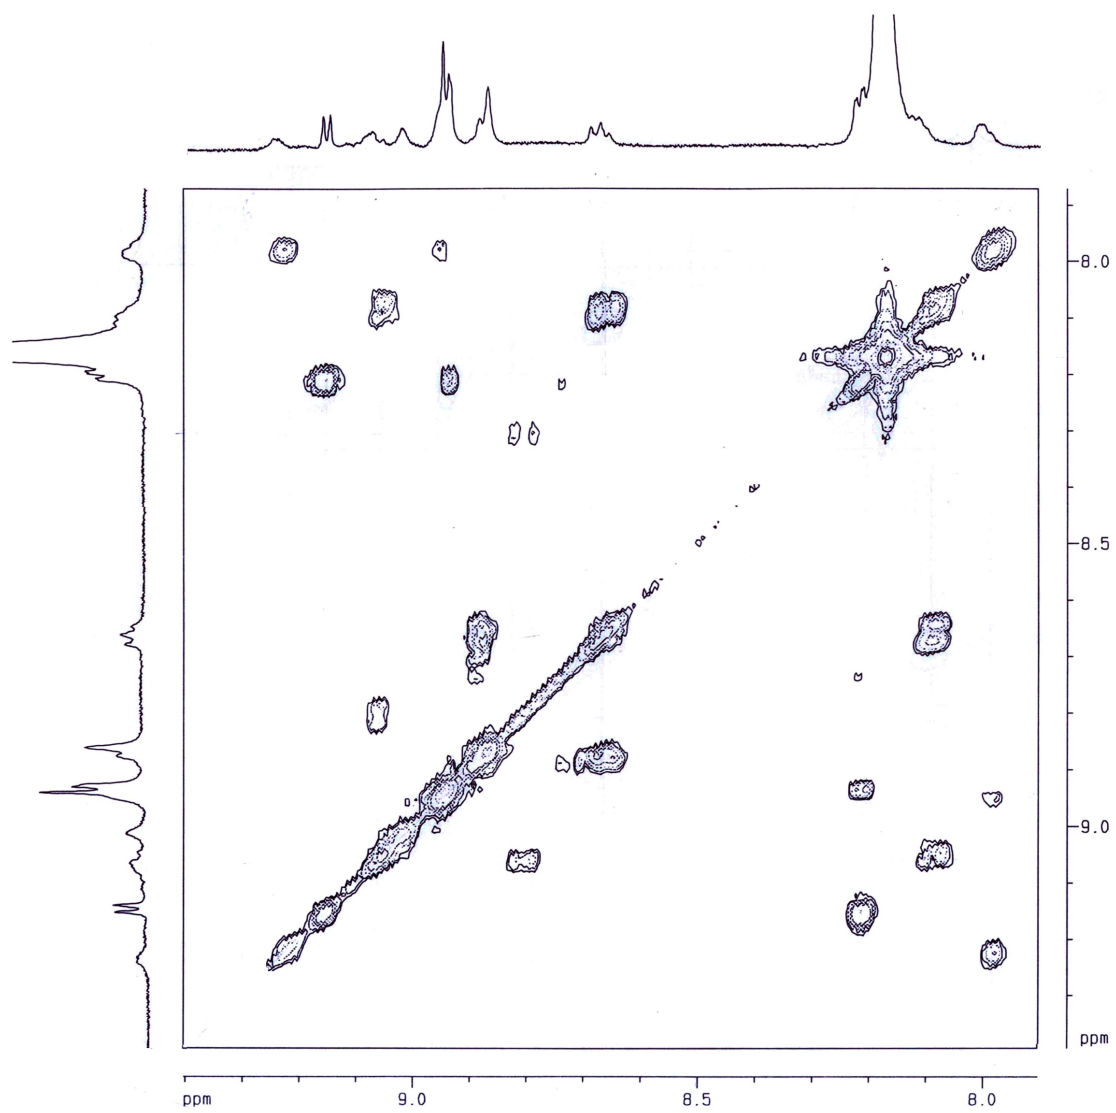

**Figure S4.** <sup>1</sup>H-<sup>1</sup>H COSY spectrum of [(<sup>t</sup>Bu<sub>3</sub>tpy)Pt(C≡Ctpy)Pt(C≡Ctpy)PtCl](OTf)<sub>3</sub> (**6**) in DMF-*d*<sub>7</sub> at 353

K.



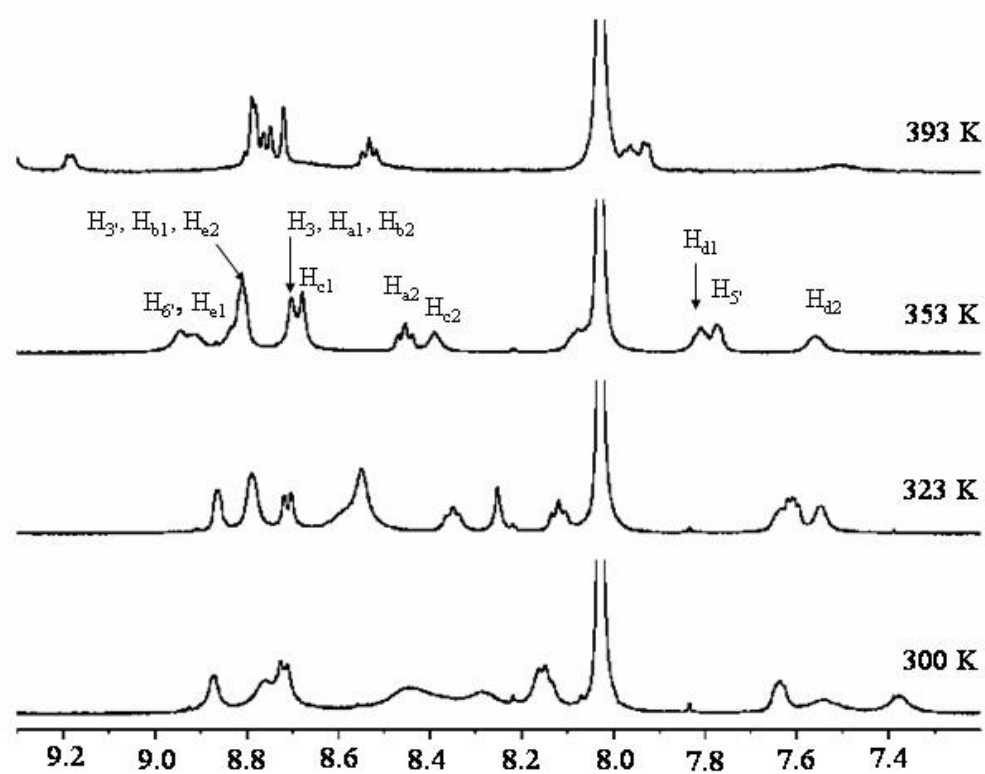

**Figure S5.**  $^1\text{H}$  NMR spectra (500 MHz) of  $[(^t\text{Bu}_3\text{tpy})\text{Pt}(\text{C}\equiv\text{Ctpy})\text{PtC}\equiv\text{Ctpy}](\text{OTf})_2$  (**5**) in  $\text{DMF-}d_7$  at various temperature.

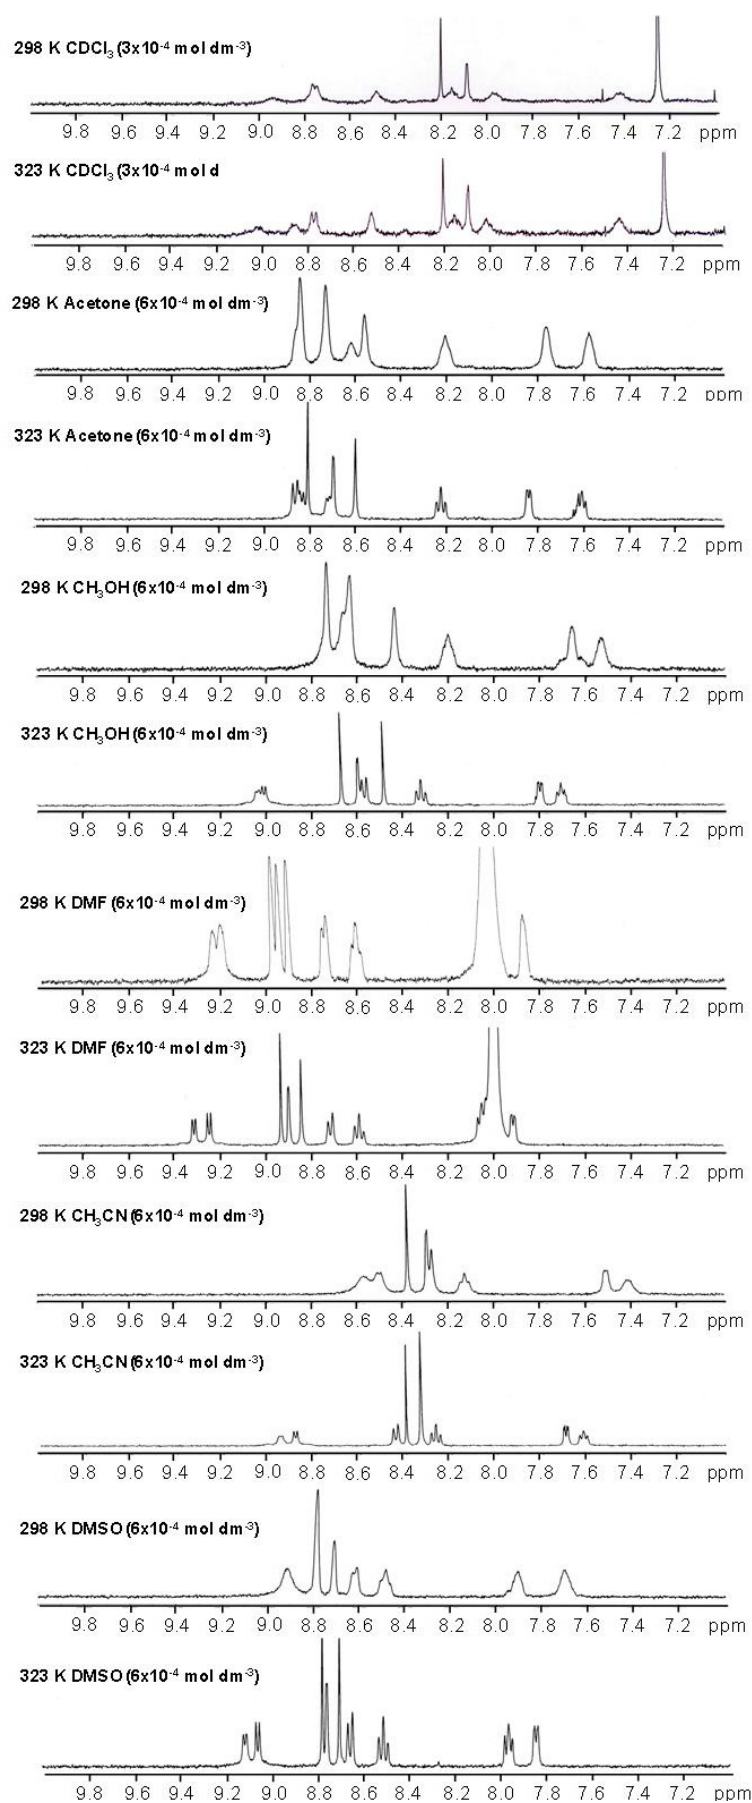

**Figure S6.**  $^1\text{H}$  NMR spectra (400 MHz) of  $[(^i\text{Bu}_3\text{tpy})\text{Pt}(\text{C}\equiv\text{Ctpy})\text{PtC}\equiv\text{C}^i\text{Bu}](\text{OTf})_2$  (**4**) in various NMR solvent at 298 K and 323 K.

**Table S1.** Spectroscopic and photophysical data of 1–6.

| Complex  | Medium                                                    | T / K | $\lambda_{\text{abs}}^{\text{a,b}} / \text{nm}$ ( $\epsilon / \times 10^4 \text{ dm}^3 \text{ mol}^{-1} \text{ cm}^{-1}$ )             | $\lambda_{\text{em}}^{\text{c,d}} / \text{nm}$ ( $\tau / \mu\text{s}$ ) | $\phi_{\text{em}}^{\text{e}}$ |
|----------|-----------------------------------------------------------|-------|----------------------------------------------------------------------------------------------------------------------------------------|-------------------------------------------------------------------------|-------------------------------|
| <b>1</b> | CH <sub>3</sub> CN                                        | 298   | 285 (2.71), 312 (1.81), 322 (1.65), 338 (1.86), 414 (0.44)                                                                             | 537 (0.02)                                                              | <0.01                         |
|          | CH <sub>2</sub> Cl <sub>2</sub>                           | 298   | 287 (2.77), 317 (1.99), 325 (1.70), 341 (1.74), 400 (sh, 0.54), 429 (0.64)                                                             | 547 (3.2)                                                               | 0.41                          |
|          | <sup>n</sup> BuCN                                         | 77    |                                                                                                                                        | 498 (8.4), 530 (8.0)                                                    |                               |
|          | Solid                                                     | 298   |                                                                                                                                        | 545 (1.3), 583 (sh, 4.0)                                                |                               |
|          | Solid                                                     | 77    |                                                                                                                                        | 507 (1.1), 540 (1.9), 583 (4.0)                                         |                               |
| <b>2</b> | CH <sub>3</sub> CN                                        | 298   | 245 (4.03), 277 (sh, 4.39), 286 (5.10), 308 (1.84), 319 (1.65), 334 (1.62), 382 (sh, 0.49), 405 (br, 0.59)                             | 519 (0.3)                                                               | <0.01                         |
|          | CH <sub>2</sub> Cl <sub>2</sub>                           | 298   | 248 (5.28), 278 (sh, 5.50), 287 (5.98), 313 (2.30), 323 (sh, 1.94), 338 (1.75), 416 (br, 0.70)                                         | 530 (0.7)                                                               | 0.07                          |
|          | <sup>n</sup> BuCN                                         | 77    |                                                                                                                                        | 478 (7), 510 (7), 540 (sh, 7), 613 (sh, 2)                              |                               |
|          | Solid                                                     | 298   |                                                                                                                                        | 520 (1), 545 (sh, 1)                                                    |                               |
|          | Solid                                                     | 77    |                                                                                                                                        | 524 (4), 565 (sh, 4), 610 (sh, 5)                                       |                               |
| <b>3</b> | CH <sub>3</sub> CN                                        | 298   | 254 (3.91), 284 (3.66), 308 (sh, 2.05), 331 (2.49), 423 (1.66)                                                                         | 544, 587 (<0.01)                                                        | <0.01                         |
|          | CH <sub>2</sub> Cl <sub>2</sub>                           | 298   | 254 (sh, 3.48), 285 (3.14), 333 (1.84), 440 (1.36)                                                                                     | 549, 586 (sh, 1)                                                        | 0.04                          |
|          | <sup>n</sup> BuCN                                         | 77    |                                                                                                                                        | 559 (9), 607 (sh, 9), 648 (sh, 3)                                       |                               |
|          | Solid                                                     | 298   |                                                                                                                                        | 641 (0.1)                                                               |                               |
|          | Solid                                                     | 77    |                                                                                                                                        | 669 (1)                                                                 |                               |
| <b>4</b> | CH <sub>3</sub> CN                                        | 298   | 262 (5.59), 273 (sh, 5.48), 286 (6.41), 313 (3.52), 330 (3.74), 340 (3.74), 376 (sh, 1.21), 398 (sh, 1.33), 439 (1.92), 462 (sh, 1.39) | 570 (0.1)                                                               | 0.03                          |
|          | CH <sub>2</sub> Cl <sub>2</sub>                           | 298   | 264 (sh, 3.21), 275 (3.13), 288 (3.67), 315 (2.05), 338 (3.26), 384 (sh, 0.64), 409 (sh, 0.75), 446 (1.12), 463 (sh, 0.96)             | 576 (11)                                                                | 0.43                          |
|          | <sup>n</sup> BuCN                                         | 77    |                                                                                                                                        | 557 (sh, 15), 572 (12), 612 (sh, 12)                                    |                               |
|          | Solid (evaporation from CH <sub>3</sub> CN)               | 298   |                                                                                                                                        | 585 (0.2), 627 (0.2), 666 (0.3)                                         |                               |
|          | Solid (evaporation from CH <sub>2</sub> Cl <sub>2</sub> ) | 298   |                                                                                                                                        | 585 (1.3), 627 (1.1), 666 (sh, 1.1)                                     |                               |
|          | Solid                                                     | 77    |                                                                                                                                        | 591 (3), 643 (sh, 3), 671 (sh, 2)                                       |                               |
| <b>5</b> | CH <sub>3</sub> CN                                        | 298   | 253 (5.98), 287 (7.42), 330 (sh, 3.04), 434 (br, 1.96), 459 (sh, 1.43)                                                                 | 549 (0.1), 593 (sh, 0.1), 635 (sh, 0.2), 671 (0.2)                      | <0.01                         |
|          | CH <sub>2</sub> Cl <sub>2</sub>                           | 298   | 289 (3.59), 335 (sh, 1.40), 441 (1.03), 456 (1.00)                                                                                     | 560 (3.4);                                                              | 0.20                          |
|          | <sup>n</sup> BuCN                                         | 77    |                                                                                                                                        | 538 (19), 580 (13), 641 (sh, 2), 665 (sh, 2)                            |                               |
|          | Solid                                                     | 298   |                                                                                                                                        | 639 (sh) <sup>f</sup> , 669 <sup>f</sup>                                |                               |
|          | Solid                                                     | 77    |                                                                                                                                        | 536 (sh, 0.3), 589 (0.8), 640 (sh, 0.7), 676 (0.5)                      |                               |
| <b>6</b> | CH <sub>3</sub> CN                                        | 298   | 285 (4.97), 304 (sh, 3.27), 331 (3.01), 426 (2.00)                                                                                     | 546, 671 (<0.01)                                                        | <0.01                         |
|          | <sup>n</sup> BuCN                                         | 77    |                                                                                                                                        | 541 (8), 584 (sh, 8), 660 (2)                                           |                               |
|          | Solid                                                     | 298   |                                                                                                                                        | Non-emissive                                                            |                               |
|          | Solid                                                     | 77    |                                                                                                                                        | Non-emissive                                                            |                               |

<sup>a</sup> Absorption maxima; br = broad. <sup>b</sup> At  $1 \times 10^{-5} \text{ mol dm}^{-3}$ ; <sup>c</sup> Emission maxima; the most intense emission in italic; sh = shoulder. <sup>d</sup> At  $1 \times 10^{-5} \text{ mol dm}^{-3}$ . <sup>e</sup> Emission quantum yield.

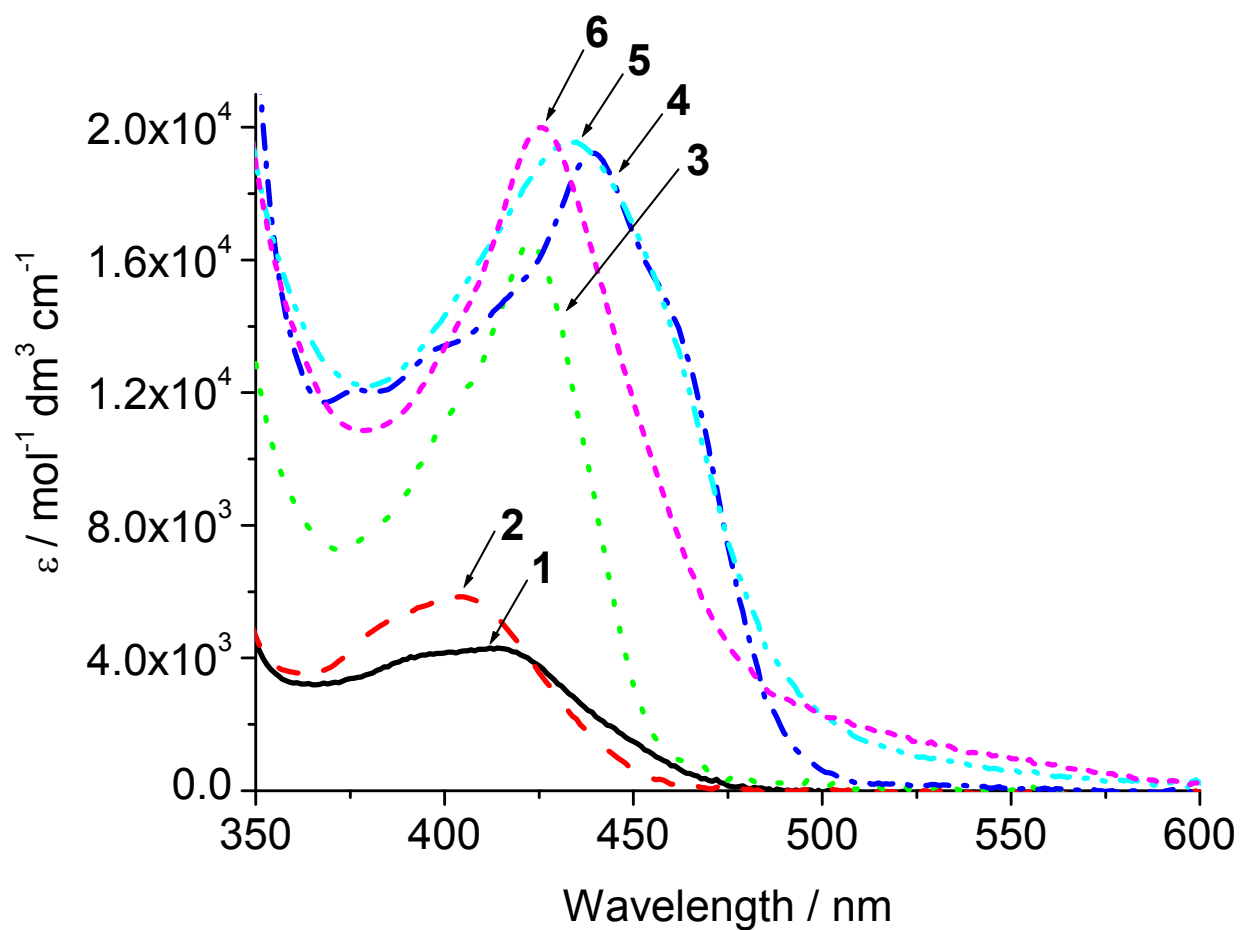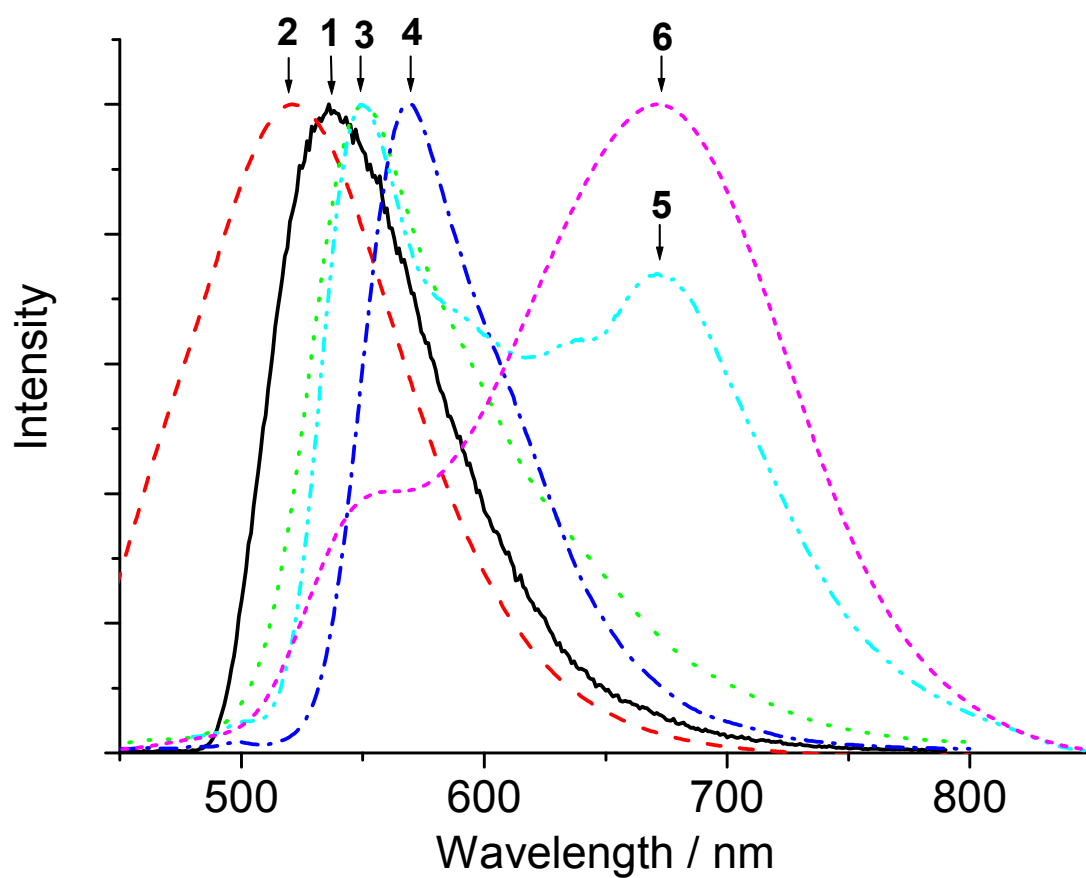

**Figure S7.** Upper: Absorption spectra of **1-6** in CH<sub>3</sub>CN solutions ( $1 \times 10^{-5} \text{ mol dm}^{-3}$ ) at 298 K. Bottom: Normalized emission spectra of **1-6** in CH<sub>3</sub>CN solutions ( $1 \times 10^{-5} \text{ mol dm}^{-3}$ ) at 298 K.

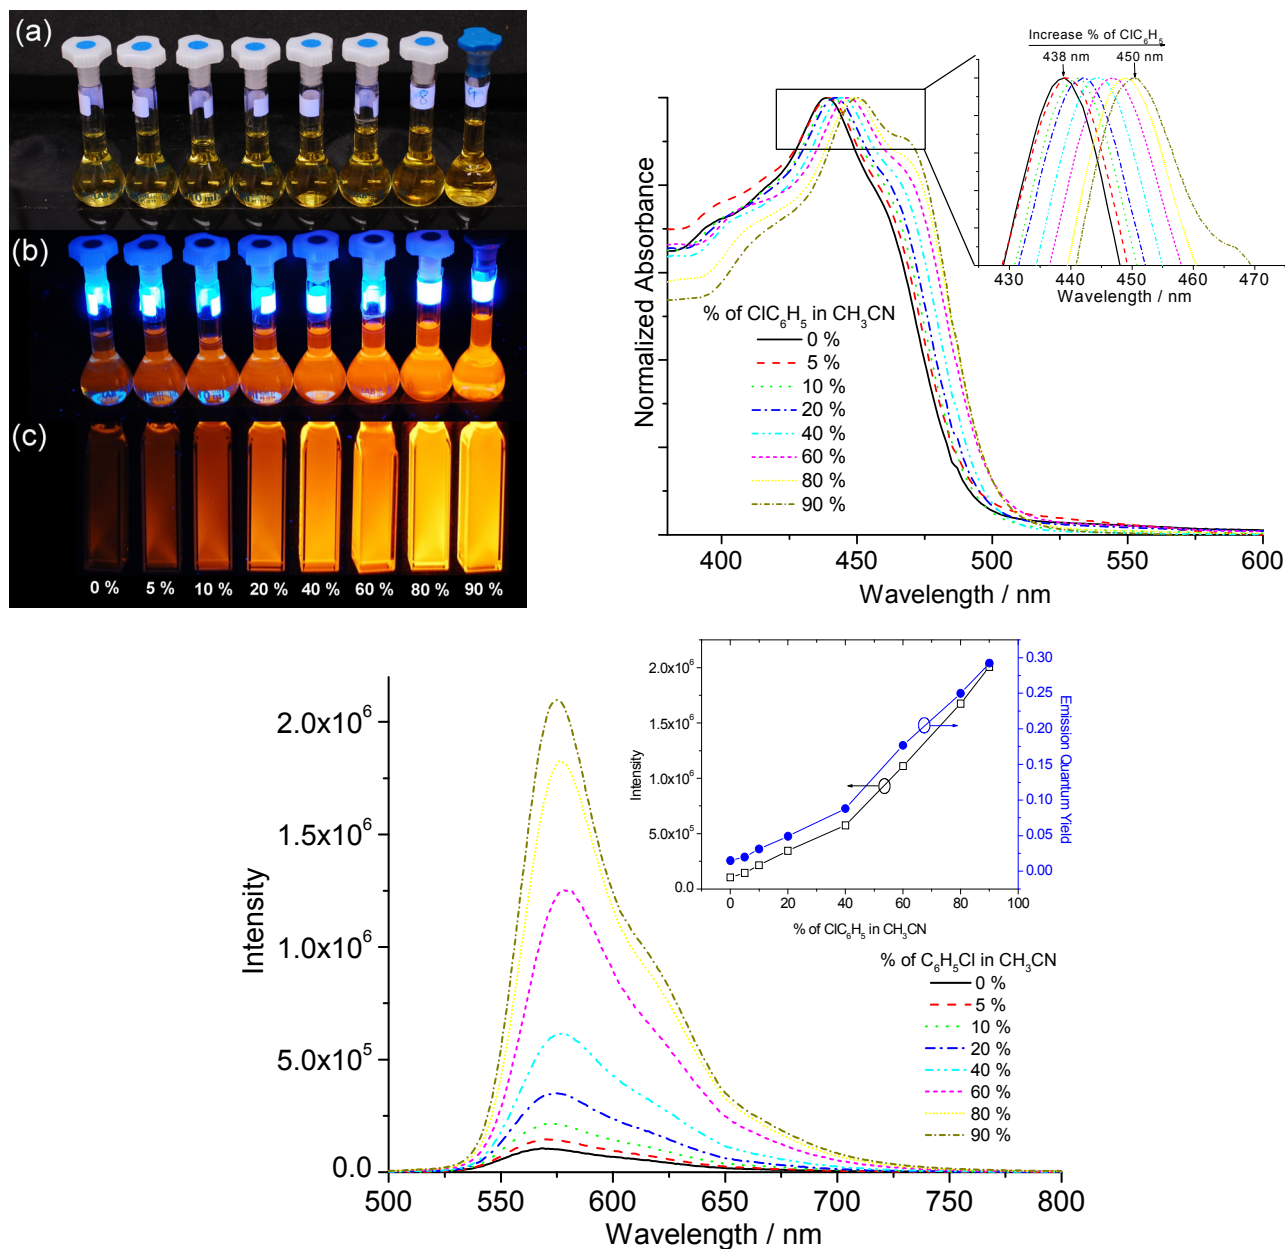

**Figure S8.** Upper Left: Photographs of complex **4** (concentration =  $2 \times 10^{-5}$  mol dm<sup>-3</sup>) in CH<sub>3</sub>CN mixed with 0–90 % ClC<sub>6</sub>H<sub>5</sub>; (a) under ambient light (in air), (b) under UV light irradiation (350 nm; in air) and (c) under UV light irradiation (350 nm; in degassed environment). Upper Right: Normalized UV-vis spectra of complex **4** (concentration =  $2 \times 10^{-5}$  mol dm<sup>-3</sup>) in CH<sub>3</sub>CN mixed with 0–90 % ClC<sub>6</sub>H<sub>5</sub> depicted from 380 nm to 600 nm. Bottom: Emission Spectra of complex **4** (concentration =  $2 \times 10^{-5}$  mol dm<sup>-3</sup>) in CH<sub>3</sub>CN mixed with 0–90 % ClC<sub>6</sub>H<sub>5</sub> (Inset: plots of intensity at 570 nm and emission quantum yield versus % of ClC<sub>6</sub>H<sub>5</sub> in CH<sub>3</sub>CN).

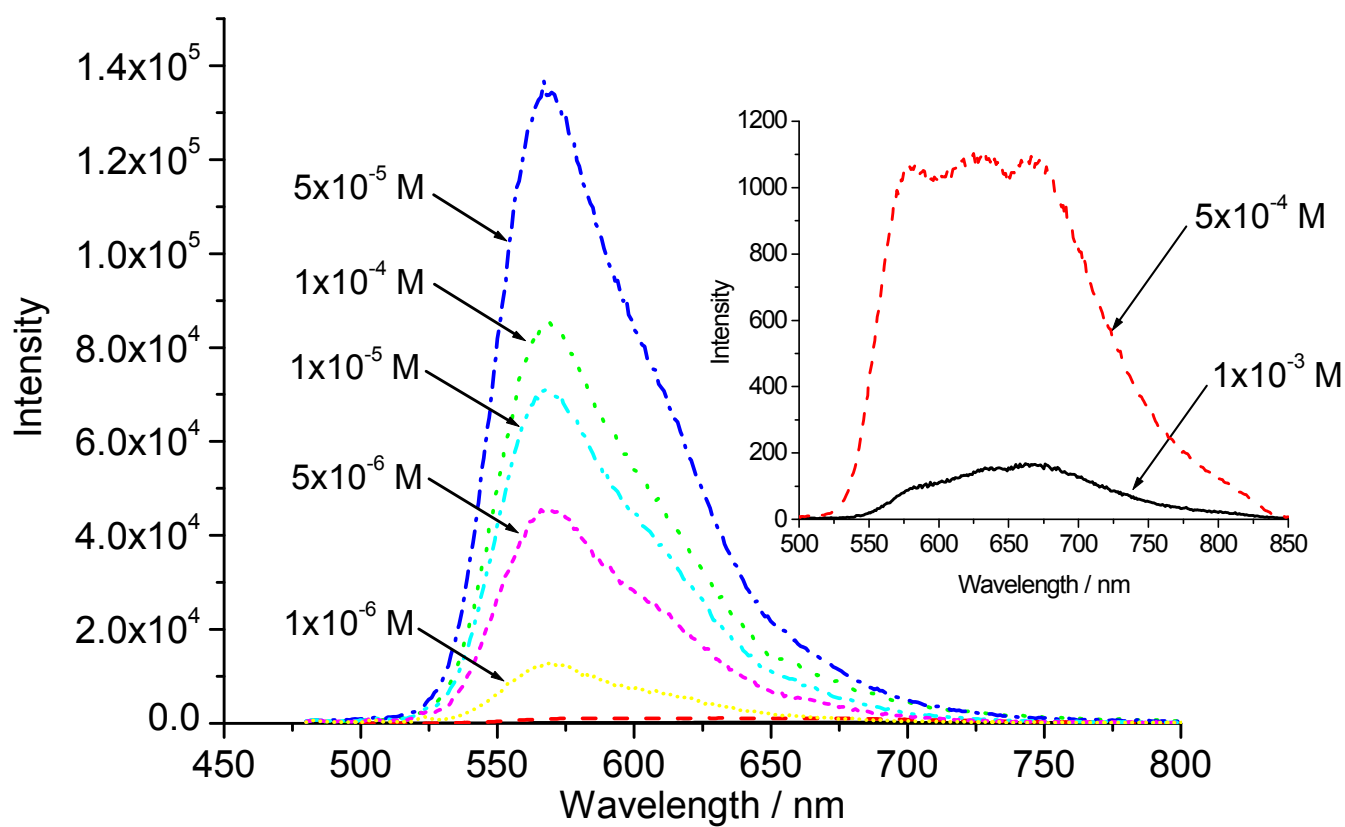

**Figure S9.** Emission spectra of complex 4 in  $\text{CH}_3\text{CN}$  at different concentration.

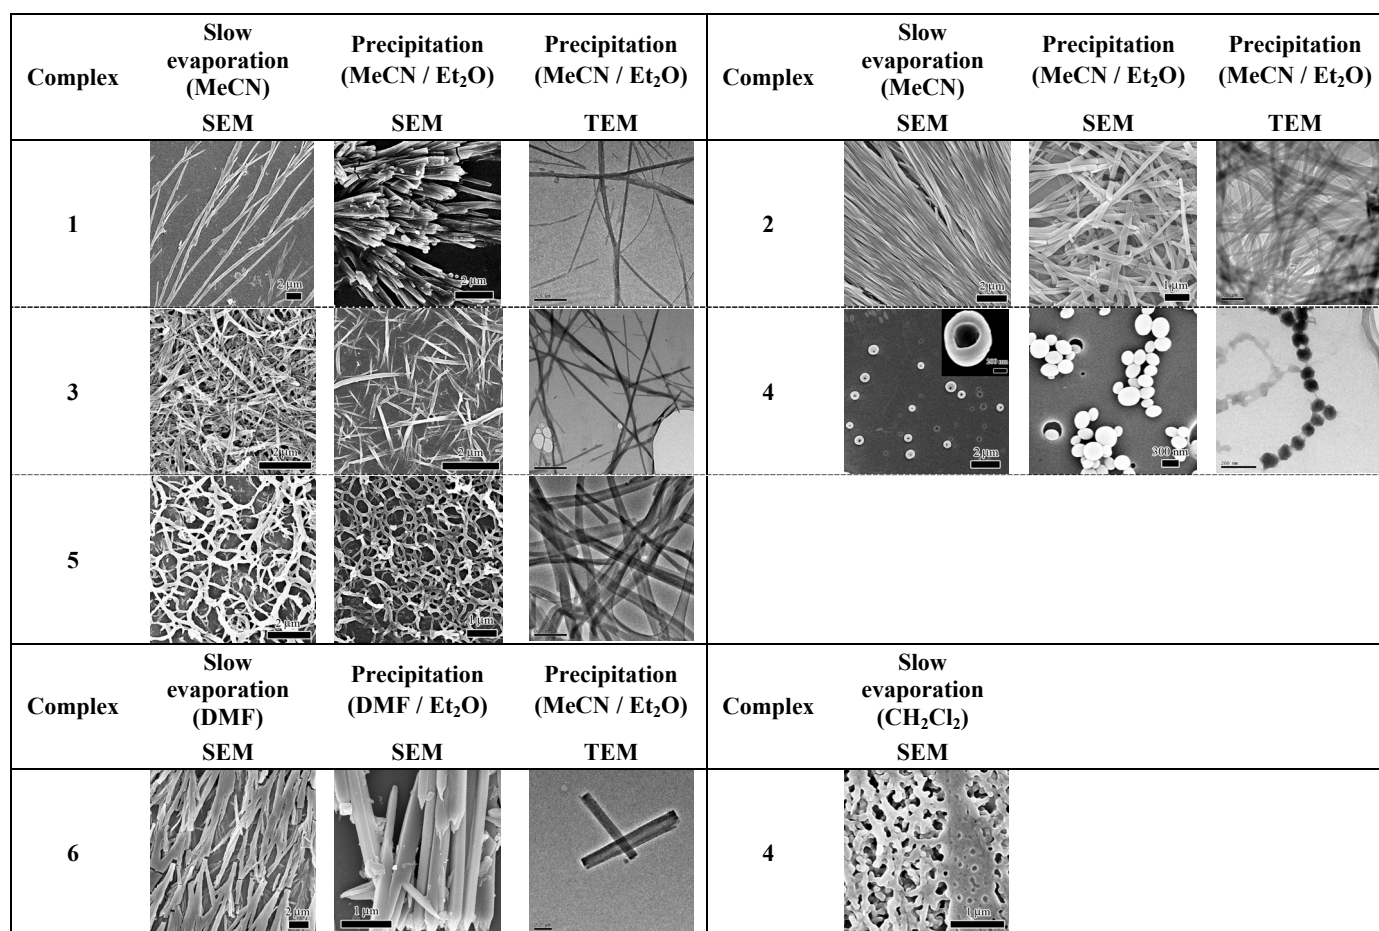

Figure S10. SEM and TEM images of complexes 1–6.

**Computational Details.** Density Functional Theory (DFT) was employed to study the photophysics of the model complex,  $[(\text{Me}_3\text{tpy})\text{Pt}(\text{C}\equiv\text{Ctpy})\text{PtC}\equiv\text{CMe}]^{2+}$  (**4'**) with the *t*Bu groups of **4** replaced by smaller Me groups. All calculations were performed using the G03 software<sup>[1]</sup> with the density functional PBE1PBE.<sup>[2]</sup> Stuttgart small core relativistic pseudopotentials and its accompanying basis set was employed for Pt<sup>[3]</sup> while the 6-31G\* basis set was used for all other atoms.<sup>[4]</sup> Two configurations were considered in the present work, coplanar and perpendicular, in which the tpy moieties are respectively coplanar and perpendicular to each other. Geometry optimizations were performed on both singlet ground state ( $S_0$ ) and the first triplet excited state ( $T_1$ ). The excited states were then calculated using time-dependent DFT (TDDFT) with solvent effect included using the polarizable continuum model (PCM) and conductor-like PCM (CPCM) as implemented in G03.<sup>[1]</sup>

- [1] Gaussian 03, Revision E.01, M. J. Frisch, G. W. Trucks, H. B. Schlegel, G. E. Scuseria, M. A. Robb, J. R. Cheeseman, J. A. Montgomery, Jr., T. Vreven, K. N. Kudin, J. C. Burant, J. M. Millam, S. S. Iyengar, J. Tomasi, V. Barone, B. Mennucci, M. Cossi, G. Scalmani, N. Rega, G. A. Petersson, H. Nakatsuji, M. Hada, M. Ehara, K. Toyota, R. Fukuda, J. Hasegawa, M. Ishida, T. Nakajima, Y. Honda, O. Kitao, H. Nakai, M. Klene, X. Li, J. E. Knox, H. P. Hratchian, J. B. Cross, V. Bakken, C. Adamo, J. Jaramillo, R. Gomperts, R. E. Stratmann, O. Yazyev, A. J. Austin, R. Cammi, C. Pomelli, J. W. Ochterski, P. Y. Ayala, K. Morokuma, G. A. Voth, P. Salvador, J. J. Dannenberg, V. G. Zakrzewski, S. Dapprich, A. D. Daniels, M. C. Strain, O. Farkas, D. K. Malick, A. D. Rabuck, K. Raghavachari, J. B. Foresman, J. V. Ortiz, Q. Cui, A. G. Baboul, S. Clifford, J. Cioslowski, B. B. Stefanov, G. Liu, A. Liashenko, P. Piskorz, I. Komaromi, R. L. Martin, D. J. Fox, T. Keith, M. A. Al-Laham, C. Y. Peng, A. Nanayakkara, M. Challacombe, P. M. W. Gill, B. Johnson, W. Chen, M. W. Wong, C. Gonzalez, and J. A. Pople, Gaussian, Inc., Wallingford CT, 2004.
- [2] (a) V. Barone, F. F. de Biani, E. Ruiz, B. Sieklucka, *B. J. Am. Chem. Soc.* **2001**, *123*, 10742–10743; (b) J.-F. Guillemoles, V. Barone, L. Joubert, C. Adamo, *C. J. Phys. Chem. A* **2002**, *106*, 11354–11360.
- [3] D. Andrae, U. Haeussermann, M. Dolg, H. Stoll, H. Preuss, *Theor. Chim. Acta* **1990**, *77*, 123–141.
- [4] (a) P. C. Hariharan, J. A. Pople,; *Theor. Chim. Acta* **1973**, *28*, 213–222; (b) M. M. Francl, W. J. Pietro, W. J. Hehre, J. S. Binkley, M. S. Gordon, D. J. DeFrees, J. A. Pople, *J. Chem. Phys.* **1982**, *77*, 3654–3665.
